# Supplementary material for: Comparing the cloud vertical structure derived from several methods based on radiosonde profiles and ground-based remote sensing measurements
Source: Copernicus journal article supplement (doi:10.5194/amt-7-2757-2014), 2014-08-27
Supplement: Supplementary file 1 [file amt-7-2757-2014-supplement.zip]

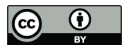

## *Supplement of*

# **Comparing the cloud vertical structure derived from several methods based on radiosonde profiles and ground-based remote sensing measurements**

**M. Costa-Surós et al.**

*Correspondence to:* M. Costa-Surós (montse.costa@udg.edu)

- Supplement-Cover-Letter.pdf
- supplementary\_material
  - sgptsimovieC1.a1.20090415.000000.mpg
  - sgptsimovieC1.a1.20090710.000000.mpg
  - sgptsimovieC1.a1.20091005.000000.mpg
